# Supplementary material for: S-acylation by ZDHHC20 targets ORAI1 channels to lipid rafts for efficient Ca2+ signaling by Jurkat T cell receptors at the immune synapse
Source: PubMed Central journal article supplement (PMC8683079; doi:10.7554/elife.72051), 2021-12-16

# FULL SCANS Figure 1, Carreras-Sureda et al.

**A**

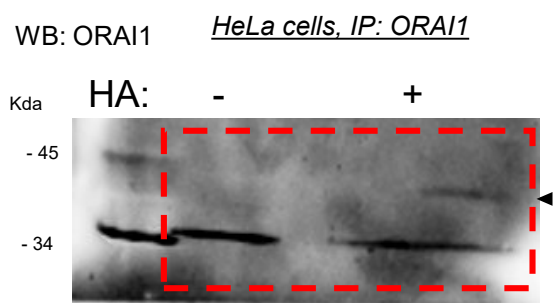

**B**

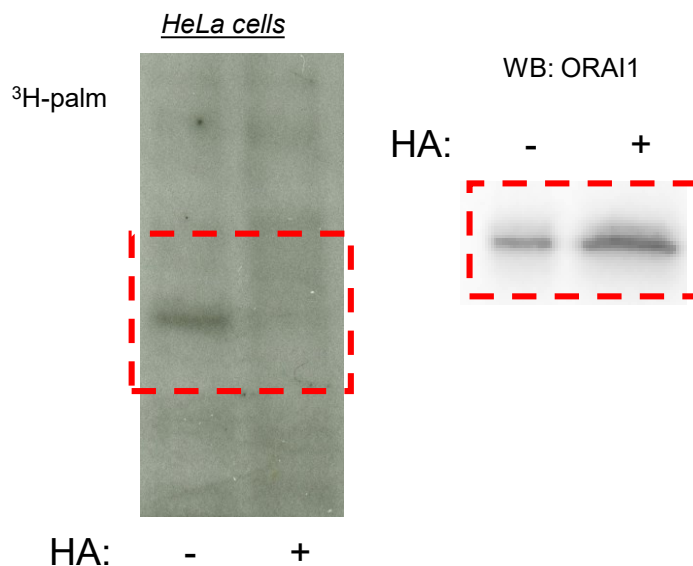

**C**

*HeLa cells*

ORAI1-GFP: WT C143A C126A C126/143A

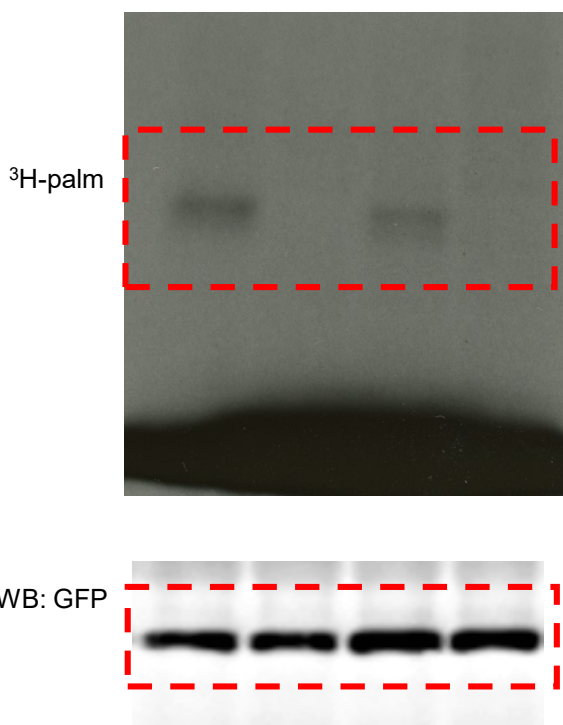

**D**

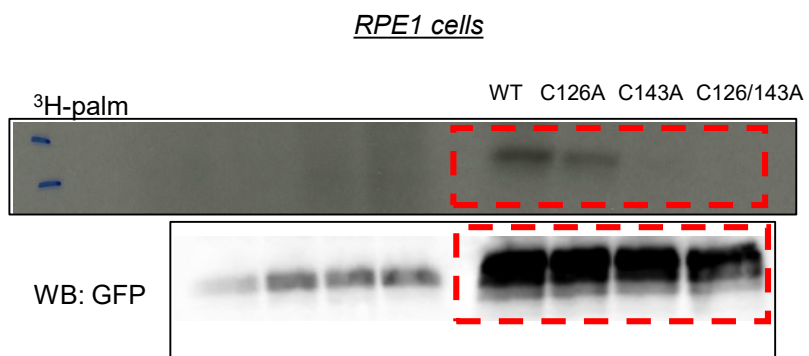

# FULL SCANS Figure 4, Carreras-Sureda et al.

**A**

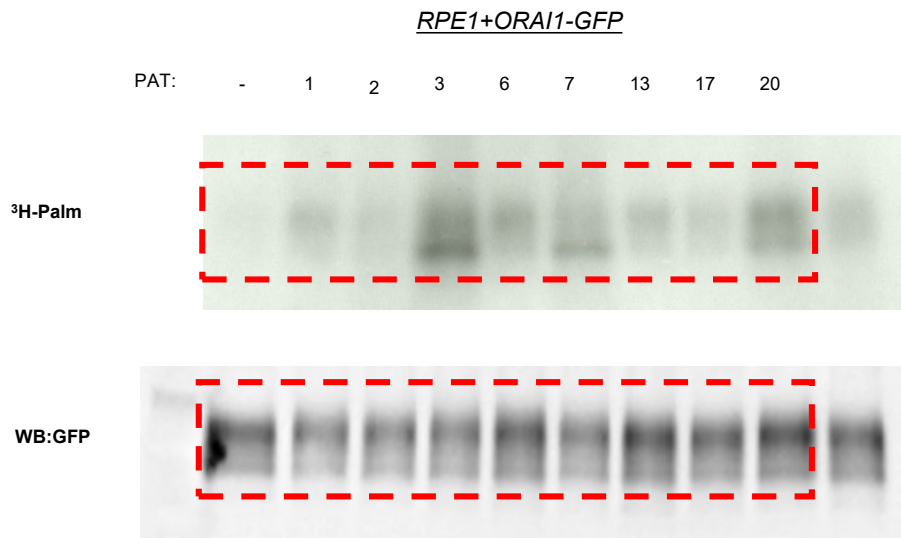

**B**

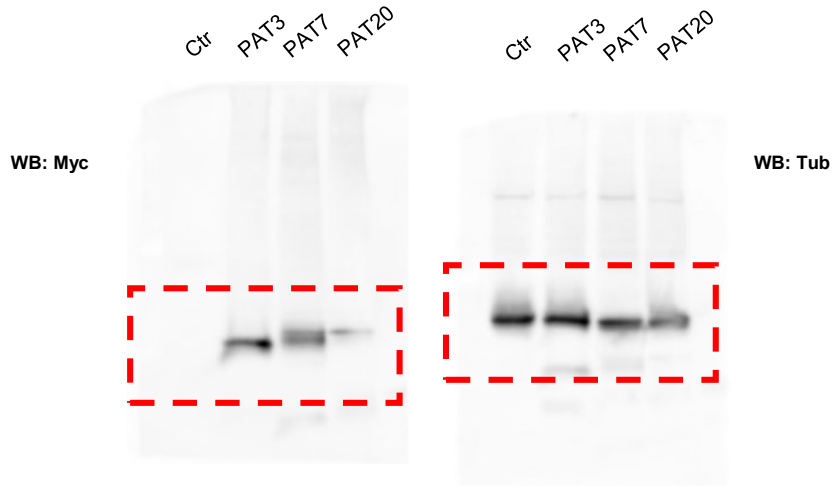

# FULL SCANS Figure 5, Carreras-Sureda et al.

**B**

CRISPR Orai1  
Total Input Cell Surface  
WT C143A WT C143A

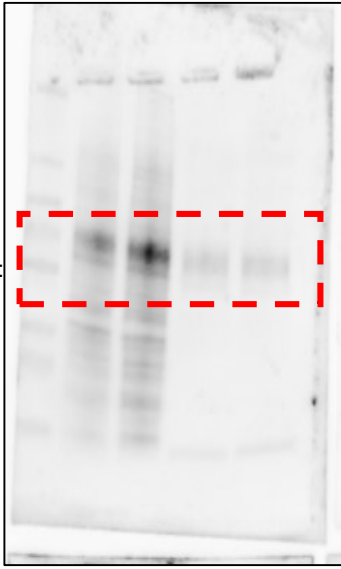

ORAI1:  
WB-GFP

CRISPR Orai1  
Total Input Cell Surface  
WT C143A WT C143A

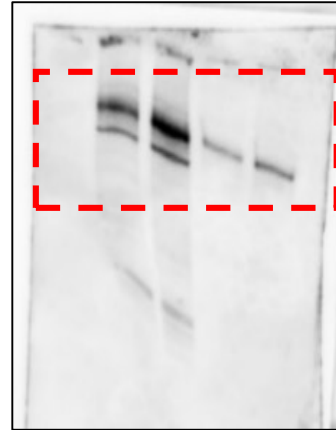

WB: PMCA

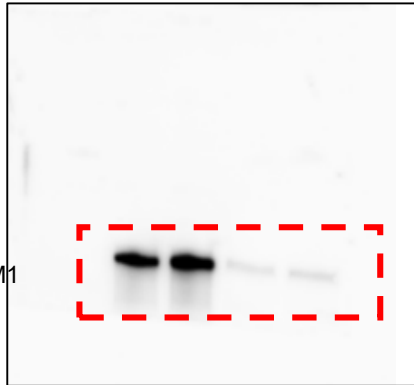

WB: STIM1

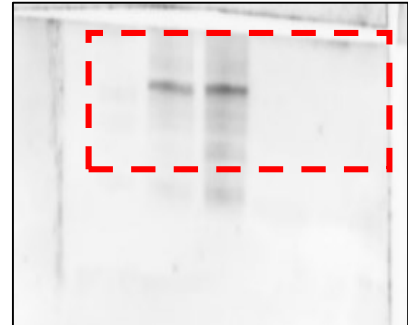

WB: GAPDH



# FULL SCANS Figure 5-supplementary 2

## CRISPR ORAI1 + ORAI1<sup>WT</sup>

PAT: 1 3 6 7 13 17 20 -

<sup>3</sup>H-Palm

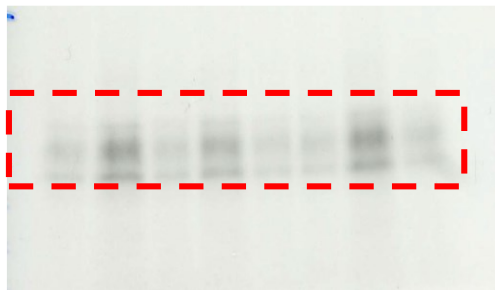

<sup>3</sup>H-Palm  
(Long Exp.)

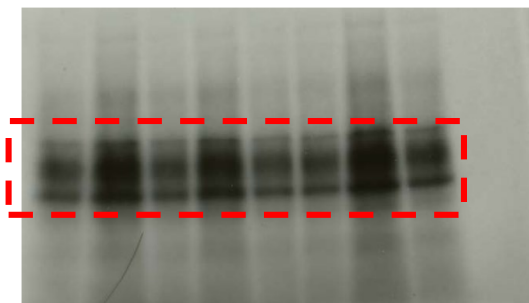

WB:GFP

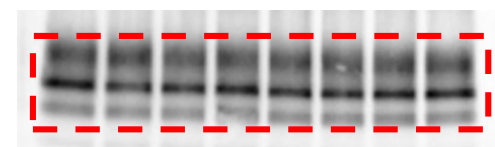

## CRISPR ORAI1 + ORAI1<sup>WT</sup> + ORAI1<sup>C143A</sup>

PAT: - 3 7 20 - 3 7 20

<sup>3</sup>H-Palm

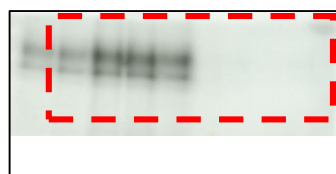

WB:GFP

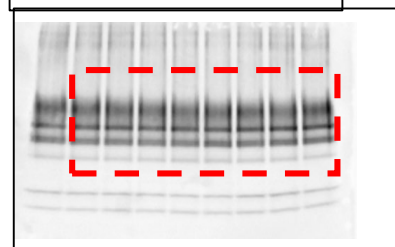

## CRISPR ORAI1 + ORAI1<sup>WT</sup>

PAT: - 3 4 5 6 7 20 21 - Kda

<sup>3</sup>H-Palm

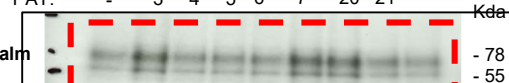

<sup>3</sup>H-Palm

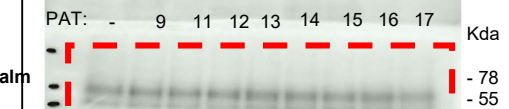

<sup>3</sup>H-Palm

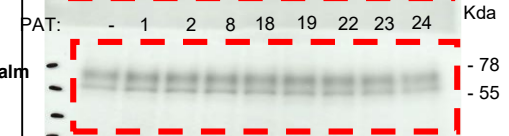

# FULL SCANS Figure 6-supplementary 3

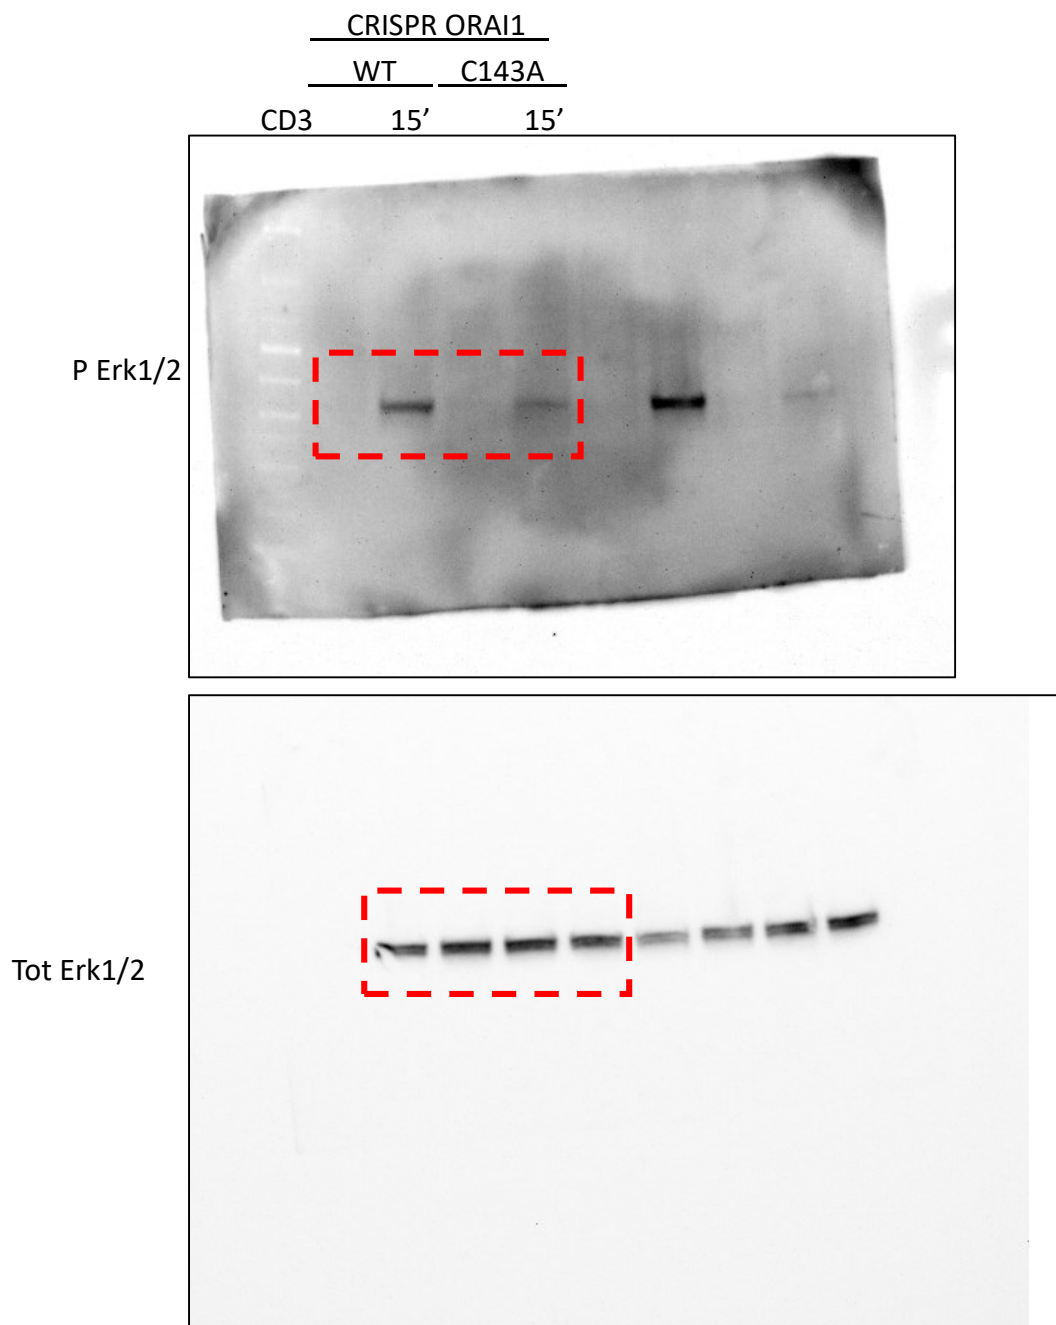

Supplement: elife-72051-supp2.pdf [file elife-72051-supp2.pdf]
