# Supplementary material for: S-acylation by ZDHHC20 targets ORAI1 channels to lipid rafts for efficient Ca2+ signaling by Jurkat T cell receptors at the immune synapse
Source: eLife. 2021 Dec 16;10:e72051. doi: 10.7554/eLife.72051 (PMC8683079; doi:10.7554/eLife.72051)
Supplement: Source data 1. [file elife-72051-supp1.xlsx]

## Sheet: Sheet1
Figure 1											Supplement
C	Dunnett's multiple comparisons test	Mean Diff.	95.00% CI of diff.	Below threshold?	Summary	Adjusted P Value		n1	n2		2	Dunnett's multiple comparisons test	Mean Diff,	95,00% CI of diff,	Significant?	Summary	Adjusted P Value		n1	n2
	WT vs. C126A	15.07	7.438 to 22.70	Yes	***	0.0006		4	4			WT vs. C143A	306.6	108,4 to 504,8	Yes	***	0.0009		68	54
	WT vs. C143A	91.56	83.93 to 99.19	Yes	****	<0.0001		4	4			WT vs. C126A	-118.4	-296,7 to 59,96	No	ns	0.2771		68	82
	WT vs. C126/143A	93.78	85.53 to 102.0	Yes	****	<0.0001		4	3			WT vs. C126/143A	368.1	157,7 to 578,5	Yes	***	0.0001		68	44
D
	Dunnett's multiple comparisons test	Mean Diff.	95.00% CI of diff.	Below threshold?	Summary	Adjusted P Value		n1	n2
	WT vs. C126A	11.96	3.591 to 20.34	Yes	**	0.0086		3	3
	WT vs. C143A	89.35	80.98 to 97.73	Yes	****	<0.0001		3	3
	WT vs. C126/143A	90.9	82.53 to 99.28	Yes	****	<0.0001		3	3
F	Dunnett's multiple comparisons test	Mean Diff.	95.00% CI of diff.	Below threshold?	Summary	Adjusted P Value		n1	n2
	WT vs. C126A	-2.975	-15.21 to 9.263	No	ns	0.8585		8	8
	WT vs. C126S	-2.875	-14.36 to 8.607	No	ns	0.8469		8	8
	WT vs. C143A	24.26	2.821 to 45.71	Yes	*	0.0291		8	8
	WT vs. C143S	22.79	5.788 to 39.79	Yes	*	0.0128		8	8
Figure 2											supplement
A	Unpaired t test				WT	C143A					2	Two-way RM ANOVA	Matching: Stacked
	P value	<0,0001		Number of values	192	243						Assume sphericity?	Yes
	P value summary	****		Mean	5.373	2.026						Alpha	0.05
	One- or two-tailed P value?	Two-tailed		Std. Deviation	2.328	1.043
				Std. Error of Mean	0.168	0.06688						Source of Variation	% of total variation	P value	P value summary	Significant?
												Time x mut	0.1905	0.1603	ns	No
												Time	20.15	<0.0001	****	Yes
												Mutation	38.54	0.0001	***	Yes
												Subject	38.76	<0.0001	****	Yes
E	Unpaired t test				WT	C143A						Source of Variation	% of total variation	P value	P value summary	Significant?
	P value	0.0046		Number of values	12	14						Time x mut	0.2181	0.7875	ns	No
	P value summary	**		Mean	47.46	10.58						Time	7.565	0.0004	***	Yes
	Significantly different (P < 0.05)?	Yes		Std. Deviation	43.23	8.992						Mutation	31.34	0.0009	***	Yes
	One- or two-tailed P value?	Two-tailed		Std. Error of Mean	12.48	2.403						Subject	47.26	<0.0001	****	Yes
F	Unpaired t test				WT	C143A
	P value	0.0002		Number of values	11	11
	P value summary	***		Mean	204.5	332.8
	Significantly different (P < 0.05)?	Yes		Std. Deviation	52.73	76.06
	One- or two-tailed P value?	Two-tailed		Std. Error of Mean	15.9	22.93
Figure 3											supplement
											3
C	Unpaired t test				WT	C143A						Unpaired t test			WT	C143A
	P value	0.041		Number of values	13	12						P value	0.0353	Number of values	7	7
	P value summary	*		Mean	90.92	63.67						P value summary	*	Mean	13.19	9.576
	Significantly different (P < 0.05)?	Yes		Std. Deviation	44.86	26.92						Significantly different (P < 0.05)?	Yes	Std. Deviation	3.124	2.545
	One- or two-tailed P value?	One-tailed		Std. Error of Mean	12.44	7.77						One- or two-tailed P value?	Two-tailed	Std. Error of Mean	1.181	0.9621
D
	Unpaired t test				WT	C143A
	P value	0.0253		Number of values	13	12
	P value summary	*		Mean	11090	7831
	Significantly different (P < 0.05)?	Yes		Std. Deviation	4339	3472
	One- or two-tailed P value?	One-tailed		Std. Error of Mean	1203	1002
E
	Unpaired t test				WT	C143A
	P value	0.0001		Number of values	13	13
	P value summary	***		Mean	0.9254	0.8706
	Significantly different (P < 0.05)?	Yes		Std. Deviation	0.02767	0.03268
	One- or two-tailed P value?	Two-tailed		Std. Error of Mean	0.007676	0.009434
Figure 4											supplement
											1	siPAT3
A	Dunnett's multiple comparisons test	Mean Diff.	95.00% CI of diff.	Below threshold?	Summary	Adjusted P Value						Dunnett's multiple comparisons test	Mean Diff.	95.00% CI of diff.	Below threshold?	Summary	Adjusted P Value
	Empty vs. 1	-7.987	-98.43 to 82.46	No	ns	0.9996						Control vs. PAT3	0.5291	0.2937 to 0.7644	Yes	****	<0.0001
	Empty vs. 2	0.08667	-90.36 to 90.53	No	ns	>0.9999						Control vs. PAT7	0.3414	-0.003111 to 0.6859	No	ns	0.0525
	Empty vs. 3	-123.6	-214.0 to -33.15	Yes	**	0.0052						Control vs. PAT20	0.4926	0.1481 to 0.8371	Yes	**	0.0039
	Empty vs. 6	-15.06	-105.5 to 75.38	No	ns	0.9971						Test details	Mean 1	Mean 2	Mean Diff.	SE of diff.	n1	n2
	Empty vs. 7	-138.4	-228.8 to -47.96	Yes	**	0.0019						Control vs. PAT3	1.069	0.5402	0.5291	0.09222	12	9
	Empty vs. 13	-10.53	-101.0 to 79.91	No	ns	0.9995						Control vs. PAT7	1.069	0.7278	0.3414	0.135	12	3
	Empty vs. 17	-13.12	-103.6 to 77.32	No	ns	0.9977						Control vs. PAT20	1.069	0.5766	0.4926	0.135	12	3
	Empty vs. 20	-155.8	-246.2 to -65.32	Yes	***	0.0006
		Empty	1	2	3	6	7	13	17	20		siPAT7
	mean	100	108	99.91	223.6	115.1	238.4	110.5	113.1	255.8		Dunnett's multiple comparisons test	Mean Diff.	95.00% CI of diff.	Below threshold?	Summary	Adjusted P Value
	sd	0	14.84	11.91	81.91	13.48	29.48	14.09	8.217	66.55		Control vs. PAT3	-0.04007	-0.3646 to 0.2844	No	ns	0.9827
	sem	0	8.566	6.878	47.29	7.78	17.02	8.136	4.744	38.42		Control vs. PAT7	0.5624	0.2915 to 0.8333	Yes	****	<0.0001
	N3 for all											Control vs. PAT20	0.4973	0.1728 to 0.8218	Yes	**	0.0018
												Test details	Mean 1	Mean 2	Mean Diff.	SE of diff.	n1	n2
												Control vs. PAT3	1	1.04	-0.04007	0.1302	12	6
B	Dunnett's multiple comparisons test	Mean Diff,	95,00% CI of diff,	Below threshold?	Summary	Adjusted P Value						Control vs. PAT7	1	0.4376	0.5624	0.1087	12	11
	Vector vs. PAT3	0.1974	-0,3501 to 0,7449	No	ns	0.7255						Control vs. PAT20	1	0.5027	0.4973	0.1302	12	6
	Vector vs. PAT7	0.07022	-0,4249 to 0,5653	No	ns	0.9747
	Vector vs. PAT20	-0.654	-1,148 to -0,1604	Yes	**	0.0056						siPAT20
												Dunnett's multiple comparisons test	Mean Diff.	95.00% CI of diff.	Below threshold?	Summary	Adjusted P Value	A-?
	Test details	Mean 1	Mean 2	Mean Diff,	SE of diff,	n1	n2					Control vs. PAT3	-0.01011	-0.4694 to 0.4491	No	ns	>0.9999	B
	Vector vs. PAT3	3.108	2.911	0.1974	0.2319	61	49					Control vs. PAT7	0.02596	-0.4054 to 0.4573	No	ns	0.9979	C
	Vector vs. PAT7	3.108	3.038	0.07022	0.2097	61	73					Control vs. PAT20	0.7446	0.3845 to 1.105	Yes	****	<0.0001	D
	Vector vs. PAT20	3.108	3.762	-0.654	0.2091	61	74					Test details	Mean 1	Mean 2	Mean Diff.	SE of diff.	n1	n2
												Control vs. PAT3	1	1.01	-0.01011	0.1839	12	5
												Control vs. PAT7	1	0.974	0.02596	0.1727	12	6
C	Dunnett's multiple comparisons test	Mean Diff,	95,00% CI of diff,	Significant?	Summary	Adjusted P Value						Control vs. PAT20	1	0.2554	0.7446	0.1442	12	11
	Vector vs. PAT3	0.5545	-0,2497 to 1,359	No	ns	0.3091
	Vector vs. PA7	0.2829	-0,6386 to 1,204	No	ns	0.9274					1	Dunnett's multiple comparisons test	Mean Diff,	95,00% CI of diff,	Significant?	Summary	Adjusted P Value
	Vector vs. PAT20	-1.25	-2,104 to -0,3969	Yes	***	0.001						si-Scr vs. si-PAT3	1.255	0,9248 to 1,586	Yes	****	<0,0001
	Vector vs. C143A + Vector	1.164	0,3206 to 2,007	Yes	**	0.0023						si-Scr vs. si-PAT7	1.106	0,7666 to 1,444	Yes	****	<0,0001
	Vector vs. C143A + PAT20	1.275	0,2015 to 2,348	Yes	*	0.0121						si-Scr vs. si-PAT20	0.8845	0,5179 to 1,251	Yes	****	<0,0001
	Test details	Mean 1	Mean 2	Mean Diff,	SE of diff,	n1	n2					Test details	Mean 1	Mean 2	Mean Diff,	SE of diff,	n1	n2
	Vector vs. PAT3	3.14	2.586	0.5545	0.3136	129	68					si-Scr vs. si-PAT3	3.01	1.754	1.255	0.1418	61	126
	Vector vs. PA7	3.14	2.857	0.2829	0.3594	129	46					si-Scr vs. si-PAT7	3.01	1.904	1.106	0.1454	61	109
	Vector vs. PAT20	3.14	4.391	-1.25	0.3328	129	57					si-Scr vs. si-PAT20	3.01	2.125	0.8845	0.1572	61	74
	Vector vs. C143A + Vector	3.14	1.976	1.164	0.3289	129	59
	Vector vs. C143A + PAT20	3.14	1.866	1.275	0.4186	129	31				1	Dunnett's multiple comparisons test	Mean Diff.	95.00% CI of diff.	Below threshold?	Summary	Adjusted P Value	A-?
												si-Scr vs. si-PAT3	-0.235	-0.4421 to -0.02786	Yes	*	0.0215	B
D	pcdna3 vs Pat20 in WT ORAI1											si-Scr vs. si-PAT7	-0.181	-0.3865 to 0.02454	No	ns	0.0974	C
	Unpaired t test											si-Scr vs. si-PAT20	-0.224	-0.4380 to -0.009954	Yes	*	0.0378	D
	P value	0.0449
	P value summary	*										Test details	Mean 1	Mean 2	Mean Diff.	SE of diff.	n1	n2
	Significantly different (P < 0.05)?	Yes			pcdna3 wt	pcdna 3 c143a	p20wt	p20 c143a				si-Scr vs. si-PAT3	1.421	1.656	-0.235	0.0885	180	241
	One- or two-tailed P value?	One-tailed		Number of values	13	12	23	16				si-Scr vs. si-PAT7	1.421	1.602	-0.181	0.08782	180	250
				Mean	13.78	9.764	20.86	12.9				si-Scr vs. si-PAT20	1.421	1.645	-0.224	0.09145	180	208
	WT-PAT20 vs C143A-PAT20			Std. Deviation	8.711	12.06	13.01	11.67
	Unpaired t test			Std. Error of Mean	2.416	3.481	2.713	2.919			2	Dunnett's multiple comparisons test	Mean Diff,	95,00% CI of diff,	Below threshold?	Summary	Adjusted P Value	A-?
	P value	0.029										WT vs. wtp20	0.446	0,07241 to 0,8196	Yes	*	0.0144	B	wtp20
	P value summary	*										WT vs. C143A	0.4069	0,03558 to 0,7782	Yes	*	0.0277	C	C143A
	Significantly different (P < 0.05)?	Yes										WT vs. 143p20	0.4066	0,01999 to 0,7933	Yes	*	0.0365	D	143p20
	One- or two-tailed P value?	One-tailed
												Test details	Mean 1	Mean 2	Mean Diff,	SE of diff,	n1	n2	q
												WT vs. wtp20	1.817	1.371	0.446	0.1573	43	41	2.836
												WT vs. C143A	1.817	1.41	0.4069	0.1563	43	42	2.603
												WT vs. 143p20	1.817	1.41	0.4066	0.1627	43	36	2.499
Figure 5											supplement
A Max peak	Tukey's multiple comparisons test	Below threshold?	Summary	Adjusted P Value							2	Unpaired t test
	CRISPR Control vs. CRISPR ORAI1	Yes	****	<0.0001								P value	0.2536
	CRISPR Control vs. CRISPR ORAI1 + ORAI1wt	Yes	****	<0.0001								P value summary	ns
	CRISPR Control vs. CRISPR ORAI1 + ORAI1C143A	Yes	****	<0.0001								Significantly different (P < 0.05)?	No
	CRISPR ORAI1 vs. CRISPR ORAI1 + ORAI1WT	Yes	****	<0.0001								One- or two-tailed P value?	Two-tailed
	CRISPR ORAI1 vs. CRISPR ORAI1 + ORAI1C143A	Yes	*	0.0335
	CRISPR ORAI1 + ORAI1WT vs. CRISPR ORAI1 + ORAI1C143A	Yes	****	<0.0001							5	Dunnett's multiple comparisons test	Mean Diff.	95.00% CI of diff.	Below threshold?	Summary	Adjusted P Value	A-?
												CRISPR Control + Vector vs. CRISPR Control + PAT 20	-0.1652	-0.3191 to -0.01126	Yes	*	0.0314	B
	Test details	Mean Diff.	SE of diff.	n1	n2							CRISPR Control + Vector vs. CRISPR ORAI1 + Vector	0.2336	-0.001295 to 0.4685	No	ns	0.0517	C
	CRISPR Control vs. CRISPR ORAI1	3.058	0.1987	210	242							CRISPR Control + PAT20 vs. CRISPR ORAI1 + PAT20	0.4029	0.1623 to 0.6436	Yes	***	0.0003	D
	CRISPR Control vs. CRISPR ORAI1 + ORAI1wt	-1.232	0.2113	210	189
	CRISPR Control vs. CRISPR ORAI1 + ORAI1C143A	3.604	0.2074	210	203							Test details	Mean 1	Mean 2	Mean Diff.	SE of diff.	n1	n2
	CRISPR ORAI1 vs. CRISPR ORAI1 + ORAI1WT	-4.289	0.2045	242	189							CRISPR Control + Vector vs. CRISPR Control + PAT 20	1.426	1.591	-0.1652	0.06322	33	39
	CRISPR ORAI1 vs. CRISPR ORAI1 + ORAI1C143A	0.5458	0.2005	242	203							CRISPR Control + Vector vs. CRISPR ORAI1 + Vector	1.426	1.192	0.2336	0.09649	33	10
	CRISPR ORAI1 + ORAI1WT vs. CRISPR ORAI1 + ORAI1C143A	4.835	0.213	189	203							CRISPR Control + PAT20 vs. CRISPR ORAI1 + PAT20	1.591	1.188	0.4029	0.09885	39	9
Slope	Tukey's multiple comparisons test	Mean Diff.	95.00% CI of diff.	Below threshold?	Summary	Adjusted P Value					7
	CRISPR Control vs. CRISPR ORAI1	0.2665	0.2415 to 0.2915	Yes	****	<0.0001						Unpaired t test WT SIC vs C143A siC
	CRISPR Control vs. CRISPR ORAI1 + ORAI1wt	0.09685	0.07024 to 0.1235	Yes	****	<0.0001						P value	0.0284
	CRISPR Control vs. CRISPR ORAI1 + ORAI1C143A	0.2796	0.2535 to 0.3057	Yes	****	<0.0001						P value summary	*
	CRISPR ORAI1 vs. CRISPR ORAI1 + ORAI1WT	-0.1697	-0.1955 to -0.1439	Yes	****	<0.0001						Significantly different (P < 0.05)?	Yes
	CRISPR ORAI1 vs. CRISPR ORAI1 + ORAI1C143A	0.01302	-0.01228 to 0.03832	No	ns	0.5475						One- or two-tailed P value?	One-tailed
	CRISPR ORAI1 + ORAI1WT vs. CRISPR ORAI1 + ORAI1C143A	0.1827	0.1558 to 0.2096	Yes	****	<0.0001									WT	WT	C143A	C143A
															sic CD3	sip20 CD3	sic CD3	sip20 CD3
	Test details	Mean 1	Mean 2	Mean Diff.	SE of diff.	n1	n2							Number of values	9	9	6	6
	CRISPR Control vs. CRISPR ORAI1	0.3421	0.0756	0.2665	0.009713	210	240					Unpaired t test WT siC vs WT si p20		Mean	14.07	11.07	10.74	11
	CRISPR Control vs. CRISPR ORAI1 + ORAI1wt	0.3421	0.2453	0.09685	0.01034	210	187					P value	0.0272	Std. Deviation	2.909	3.216	3.212	1.186
	CRISPR Control vs. CRISPR ORAI1 + ORAI1C143A	0.3421	0.06258	0.2796	0.01014	210	201					P value summary	*	Std. Error of Mean	0.9696	1.072	1.311	0.4842
	CRISPR ORAI1 vs. CRISPR ORAI1 + ORAI1WT	0.0756	0.2453	-0.1697	0.01003	240	187					Significantly different (P < 0.05)?	Yes
	CRISPR ORAI1 vs. CRISPR ORAI1 + ORAI1C143A	0.0756	0.06258	0.01302	0.009829	240	201					One- or two-tailed P value?	One-tailed
	CRISPR ORAI1 + ORAI1WT vs. CRISPR ORAI1 + ORAI1C143A	0.2453	0.06258	0.1827	0.01044	187	201
C	Unpaired t test AUC				WT	C143A
	P value	0.0005		Number of values	52	72
	P value summary	***		Mean	970.7	694.4
	Significantly different (P < 0.05)?	Yes		Std. Deviation	536.7	313.8
	One- or two-tailed P value?	Two-tailed		Std. Error of Mean	74.42	36.99
	Unpaired t test Peak				WT	C143A
	P value	<0.0001		Number of values	52	72
	P value summary	****		Mean	3.81	2.88
	Significantly different (P < 0.05)?	Yes		Std. Deviation	1.226	0.9574
	One- or two-tailed P value?	Two-tailed		Std. Error of Mean	0.1684	0.1128
D
	Šídák's multiple comparisons test	Mean Diff.	95.00% CI of diff.	Below threshold?	Summary	Adjusted P Value
TG	CRISPR Control vs. CRISPR ORAI1	1.131	0.004405 to 2.258	Yes	*	0.0487	F-G
TG	CRISPR ORAI1 + ORAI1WT vs. CRISPR ORAI1 + ORAI1C143A	1.392	0.2426 to 2.542	Yes	*	0.0108	H-I
PMA	CRISPR Control vs. CRISPR ORAI1	0.1034	-0.8424 to 1.049	No	ns	0.9978	K-L
PMA	CRISPR ORAI1 + ORAI1WT vs. CRISPR ORAI1 + ORAI1C143A	0.7122	-0.6498 to 2.074	No	ns	0.5671	M-N
	Test details	Mean 1	Mean 2	Mean Diff.	SE of diff.	n1	n2
TG	CRISPR Control vs. CRISPR ORAI1	2.246	1.115	1.131	0.4461	10	12
TG	CRISPR ORAI1 + ORAI1WT vs. CRISPR ORAI1 + ORAI1C143A	2.071	0.6785	1.392	0.4552	11	10
PMA	CRISPR Control vs. CRISPR ORAI1	1.328	1.225	0.1034	0.3744	15	16
PMA	CRISPR ORAI1 + ORAI1WT vs. CRISPR ORAI1 + ORAI1C143A	1.491	0.7792	0.7122	0.5392	7	8
E	Tukey's multiple comparisons test	Predicted (LS) mean diff,	95,00% CI of diff,	Below threshold?	Summary	Adjusted P Value
	CRISPR Control vs. CRISPR ORAI1	2.303	1,355 to 3,251	Yes	****	<0,0001
	CRISPR Control vs. CRISPR ORAI1 + ORAI1C143A	2.206	1,437 to 2,975	Yes	****	<0,0001
	CRISPR ORAI1 vs. CRISPR ORAI1 + ORAI1WT	-1.816	-2,670 to -0,9622	Yes	****	0.0007
	CRISPR ORAI1 + ORAI1WT vs. CRISPR ORAI1 + ORAI1C143A	1.719	1,070 to 2,368	Yes	****	<0,0001
	Test details	Mean 1	Mean 2	Mean Diff,	SE of diff,	n1	n2
	CRISPR Control vs. CRISPR ORAI1	6.975	4.672	2.303	0.5186	74	60
	CRISPR Control vs. CRISPR ORAI1 + ORAI1C143A	6.975	4.769	2.206	0.4205	74	158
	CRISPR ORAI1 vs. CRISPR ORAI1 + ORAI1WT	4.672	6.488	-1.816	0.4671	60	128
	CRISPR ORAI1 + ORAI1WT vs. CRISPR ORAI1 + ORAI1C143A	6.488	4.769	1.719	0.355	128	158
F	Šídák's multiple comparisons test	Predicted (LS) mean diff,	95,00% CI of diff,	Below threshold?	Summary	Adjusted P Value
	CRISPR ORAI1 + ORAI1WT vs. CRISPR ORAI1 + ORAI1C143A
	0	0.0909	-0,2139 to 0,3957	No	ns	0.913
	30	1.073	0,7301 to 1,416	Yes	****	<0,0001
	120	0.058	-0,2927 to 0,4087	No	ns	0.9895
	240	-0.052	-0,3871 to 0,2831	No	ns	0.9918
	Test details	Predicted (LS) mean 1	Predicted (LS) mean 2	Predicted (LS) mean diff,	SE of diff,	N1	N2
	CRISPR ORAI1 + ORAI1WT vs. CRISPR ORAI1 + ORAI1C143A
	0	0.8737	0.7828	0.0909	0.1221	113	161
	30	2.092	1.019	1.073	0.1374	87	132
	120	1.255	1.197	0.058	0.1405	105	96
	240	1.398	1.45	-0.052	0.1343	152	86
G	Unpaired t test				WT	WT cd3	C143A	C143A cd3
	P value	0.0416		Number of values	3	3	3	3
	P value summary	*		Mean	3.47	14.17	2.167	8.59
	Significantly different (P < 0.05)?	Yes		Std. Deviation	1.182	1.45	0.2442	2.926
	One- or two-tailed P value?	Two-tailed		Std. Error of Mean	0.6824	0.8373	0.141	1.689
Figure 6										supplement
B	Šídák's multiple comparisons test	Mean Diff.	95.00% CI of diff.	Below threshold?	Summary	Adjusted P Value				2	Unpaired t test
RAJI	CRISPR ORAI1 + ORAI1WT vs. CRISPR ORAI1 + ORAI1C143A	0.07559	-1.086 to 1.237	No	ns	0.9997	M-N				P value	0.8909
RAJI+SEE	CRISPR ORAI1 + ORAI1WT vs. CRISPR ORAI1 + ORAI1C143A	3.517	2.496 to 4.538	Yes	****	<0.0001	R-S				P value summary	ns
											Significantly different (P < 0.05)?	No
	Test details	Mean 1	Mean 2	Mean Diff.	SE of diff.	n1	n2				One- or two-tailed P value?	Two-tailed
RAJI	CRISPR ORAI1 + ORAI1WT vs. CRISPR ORAI1 + ORAI1C143A	1.199	1.123	0.07559	0.463	16	10
RAJI+SEE	CRISPR ORAI1 + ORAI1WT vs. CRISPR ORAI1 + ORAI1C143A	4.642	1.125	3.517	0.4069	15	17			3	One sample t test	Sample difference has zero SD
											t, df		t=3,038, df=4		WT	C143A
D	P value and statistical significance										P value (two tailed)		0.0385	Theoretical mean	1	1
	Test	Fisher's exact test									P value summary		*	Actual mean	1	0.5688
	P value	0.0014									Significant (alpha=0.05)?		Yes	Number of values	5	5
	P value summary	**
	One- or two-sided	Two-sided
	Statistically significant (P < 0.05)?	Yes
	Data analyzed	IS enrichment	Distal CAP accumulation	Total
	WT	25	4	29
	C143A	11	15	26
	Total	36	19	55
	Percentage of row total	IS enrichment	Distal CAP accumulation
	WT	86.21%	13.79%
	C143A	42.31%	57.69%
E	Unpaired t test				ORAI1WT	ORAI1C143A
	P value	0.0488		N	15	11
	P value summary	*		Mean	7.893	2.396
	Significantly different (P < 0.05)?	Yes		Std. Deviation	10.38	1.987
	One- or two-tailed P value?	One-tailed		Std. Error of Mean	2.681	0.599
G	Unpaired t test ORAI-GFP
	P value	0.0021		ORAI-GFP	ORAI1WT	ORAI1C143A
	P value summary	**		N	25	20
	Significantly different (P < 0.05)?	Yes		Mean	5.771	2.302
	One- or two-tailed P value?	Two-tailed		SD	4.481	1.657
	t, df	t=3,282, df=43		SEM	0.8962	0.3704
	Unpaired t test Phalloidin			Phalloidin	ORAI1WT	ORAI1C143A
	P value	0.002		N	25	20
	P value summary	**		Mean	4.826	3.015
	Significantly different (P < 0.05)?	Yes		SD	2.803	1.666
				SEM	0.5605	0.3726
	Unpaired t test TCR
	P value	0.0487		TCR	ORAI1WT	ORAI1C143A
	P value summary	*		N	25	20
	Significantly different (P < 0.05)?	Yes		Mean	17.46	7.82
	One- or two-tailed P value?	Two-tailed		SD	20.58	5.741
				SEM	4.116	1.284
